# Supplementary material for: Loss of circadian rhythmicity in bdnf knockout zebrafish larvae
Source: PubMed Central journal article supplement — iScience. 2022 Mar 11;25(4):104054. doi: 10.1016/j.isci.2022.104054 (PMC8957028; doi:10.1016/j.isci.2022.104054), 2022-03-11
Supplement: mmc1.pdf [file mmc1.pdf]

iScience, Volume 25

## Supplemental information

### Loss of circadian rhythmicity in *bdnf* knockout zebrafish larvae

Ylenia D'Agostino, Elena Frigato, Teresa M.R. Noviello, Mattia Toni, Flavia Frabetti, Luisa Cigliano, Michele Ceccarelli, Paolo Sordino, Luigi Cerulo, Cristiano Bertolucci, and Salvatore D'Aniello

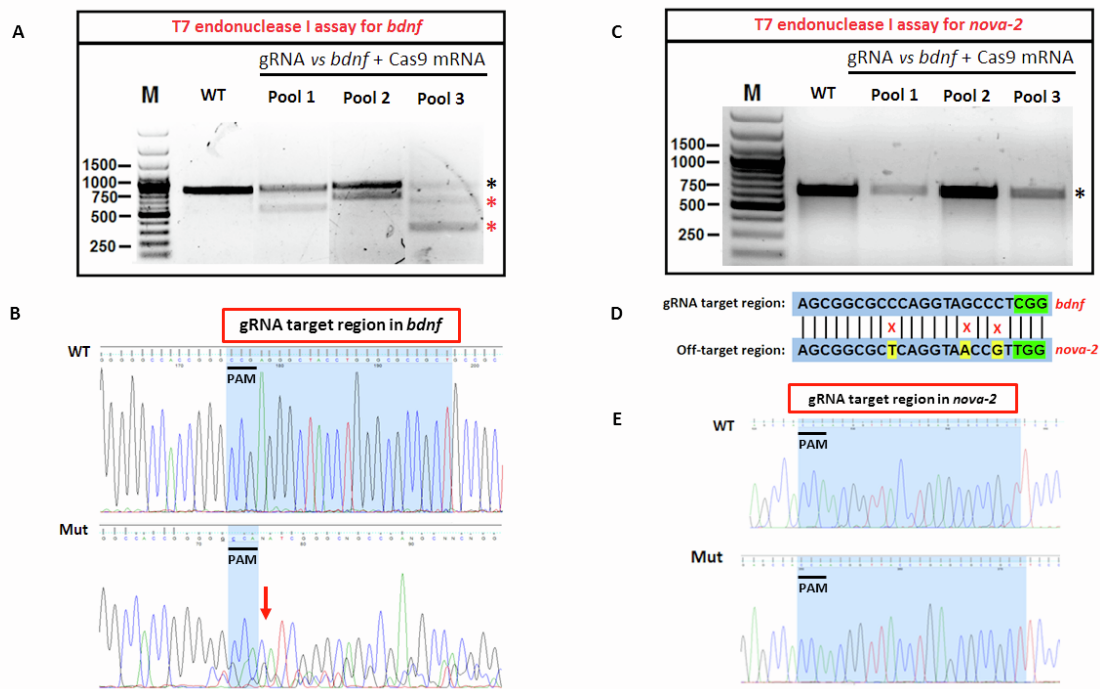

### Figure S1. T7EI assay and Sanger sequencing, related to STAR Methods.

Evidence of InDels in *bdnf* locus. A) T7EI assay showed the presence of multiple bands (red asterisks) in three independent pools of injected embryos (Pool 1-2-3) compared to the single band (black asterisk) of the wt control pool of embryos. B) The presence of InDels introduced by the gRNA in the genomic locus of *bdnf* gene was confirmed by Sanger sequencing. wt and injected embryos (mut) sequence chromatograms are reported, the red arrow indicates the point where multiple peaks appear few nucleotides downstream the PAM sequence. The target region is highlighted in light blue. M stays for 100 bp DNA ladder. Analysis of the off-target site in *nova2* locus. C) T7EI assay showed the absence of multiple bands in *nova2* for three independent pools of injected embryos (Pool 1-2-3) compared to the wt control pool of embryos. D) Predicted off-target region in *nova2* by “CRISPR DESIGN” tool. The gRNA targeting *bdnf* is not able to recognize with perfect match the predicted off-target site; the PAM sequence and the mismatch point are highlighted in green and yellow, respectively. E) The comparison between sequence chromatograms of wt and injected embryos showed no differences in the nucleotide composition. The target region is highlighted in light blue. M stays for 100 bp DNA ladder.

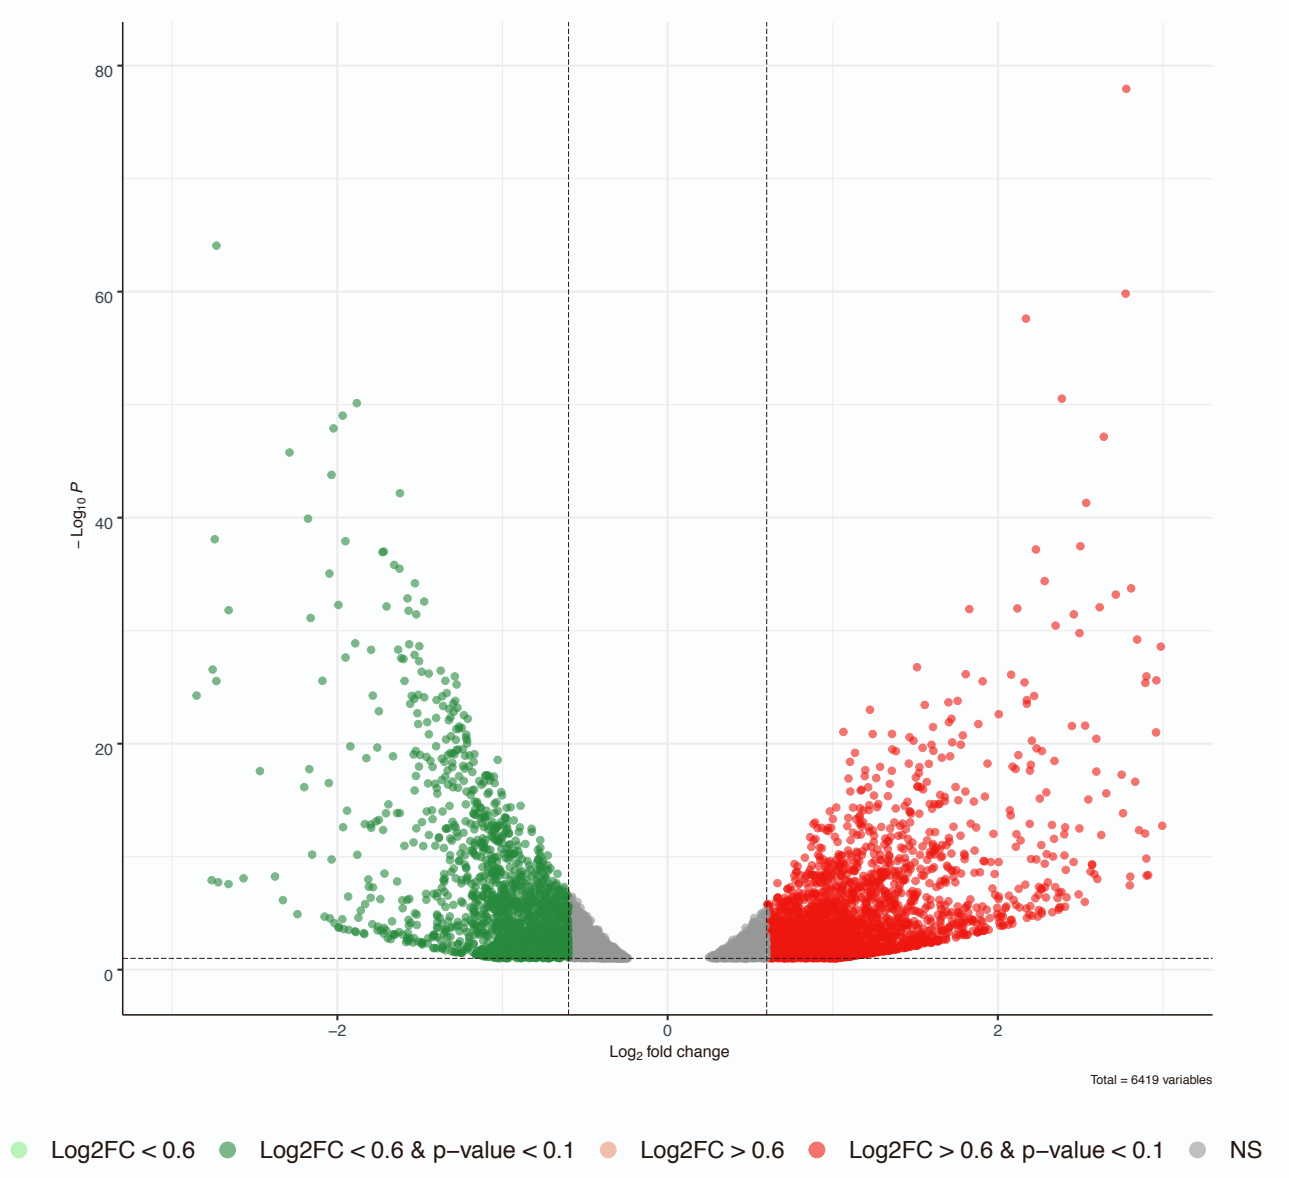

**Figure S2. Volcano plot showing differential expressed genes at embryonic stage 48 hpf, related to STAR Methods.**

Volcano Plot shows the relationship between log2 fold change and the statistical significance. The red and green dots in the plot represent the differentially expressed mRNAs with statistical significance.

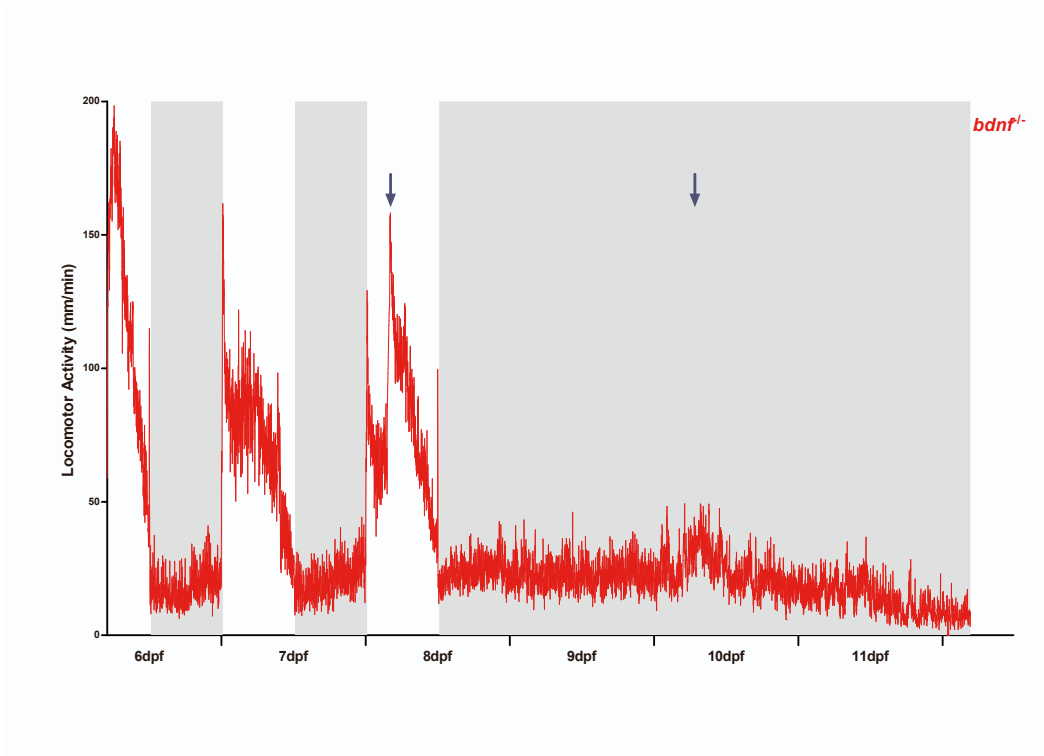

**Figure S3. Locomotor activity in DD and starvation test in *bdnf*<sup>-/-</sup> zebrafish larvae, related to Figure 6.**

Mean waveform of locomotor activity of *bdnf*<sup>-/-</sup> under 12:12 LD cycles from 6 to 8 dpf and DD from 9 to 11 dpf (n = 24). Vertical axis shows averaged distance moved (mm/1 min), while X-axis indicates time in recording. White and grey bars show light and dark phase, respectively. Black arrows indicate feeding time. Data are expressed as mean ± SEM.

**Table S1. Sequence of insert-oligonucleotides used for the customized gRNA-expression vector synthesis, related to STAR Methods.**

| gRNA name    | Oligo sequence (5' → 3')  | PAM sequence |
|--------------|---------------------------|--------------|
| Dr_bdnf_gRNA | F: TAGGCGGCGCCCAGGTAGCCCT | CGG          |
|              | R: AAACAGGGCTACCTGGGCGCCG |              |

Sticky-end are highlighted in bold.

**Table S2. Primers sequences for PCR screening of mutations in *bdnf* gene, related to STAR Methods.**

| Target gene          | Primer sequence (5' → 3') | wt amplicon size |
|----------------------|---------------------------|------------------|
| Standard PCR Dr_bdnf | F: GAAGAGTGATGACCATCCTG   | 228 bp           |
|                      | R: ATGACCTGCTCGAAAGTGTCGG |                  |

**Table S3. List of primers used T7 endonuclease I assay, related to STAR Methods.**

| Target gene  | Primer sequence (5' → 3') | wt amplicon size |
|--------------|---------------------------|------------------|
| Dr_bdnf_T7I  | F: GAAGAGTGATGACCATCCTG   | 828 bp           |
|              | R: GTGTACACTATCTGCCCC     |                  |
| Dr_nova2_T7I | F: ACAGCCTCCAGTCTCCTGGG   | 678 bp           |
|              | R: TAGCCACCTTCTGCGGATTGG  |                  |

**Table S6. Statistical analysis of clock and clock-controlled gene expression, related to Figure 4 and Figure 5.**

A: acrophase, ZT: zeitgeber time. The symbol (-) indicates the absence of peak.

| LD             | <i>bdnf<sup>f/+</sup></i> |        | <i>bdnf<sup>f/-</sup></i> |        |
|----------------|---------------------------|--------|---------------------------|--------|
|                | P                         | A (ZT) | P                         | A (ZT) |
| <i>Arntl1</i>  | <0.00001                  | 9      | <0.003                    | 9      |
| <i>Clock1a</i> | <0.0003                   | 15     | <0.00001                  | 15     |
| <i>Clock2</i>  | <0.00001                  | 9      | <0.00001                  | 9      |
| <i>Per1b</i>   | <0.00001                  | 21     | <0.0002                   | 21     |
| <i>Per2</i>    | <0.0001                   | 3      | <0.003                    | 3      |
| <i>Cry1a</i>   | <0.00001                  | 3      | <0.00001                  | 3      |
| <i>Nilf3-5</i> | <0.0002                   | 9      | <0.0002                   | 9      |
| <i>Nilf3-6</i> | <0.0001                   | 3      | <0.001                    | 3      |
| <i>Aanat2</i>  | <0.0001                   | 21     | <0.0001                   | 21     |
| <i>Mtnr1aa</i> | <0.05                     | 3      | <0.05                     | 9      |

| DD             | <i>bdnf<sup>f/+</sup></i> |        | <i>bdnf<sup>f/-</sup></i> |        |
|----------------|---------------------------|--------|---------------------------|--------|
|                | P                         | A (CT) | P                         | A (CT) |
| <i>Arntl1</i>  | <0.00001                  | 9      | <0.00001                  | 9      |
| <i>Clock1a</i> | <0.005                    | 15     | 0.07                      | -      |
| <i>Clock2</i>  | <0.0002                   | 15     | 0.09                      | -      |
| <i>Per1b</i>   | <0.00001                  | 3      | <0.00001                  | 3      |
| <i>Per2</i>    | <0.0001                   | 3      | <0.002                    | 3      |
| <i>Cry1a</i>   | <0.0001                   | 3      | <0.0001                   | 3      |
| <i>Nilf3-5</i> | <0.001                    | 15     | <0.0001                   | 9      |
| <i>Nilf3-6</i> | <0.002                    | 3      | <0.0001                   | 3      |
| <i>Aanat2</i>  | <0.0001                   | 15     | >0.05                     | -      |
| <i>Mtnr1aa</i> | <0.01                     | 3      | >0.8                      | -      |

**Table S11. List of primers used for qPCR experiments, related to Figure 4 and Figure 5.**

| <b>Genes</b>                  | <b>Forward</b>              | <b>Reverse</b>              |
|-------------------------------|-----------------------------|-----------------------------|
| <i>Per1b</i>                  | CCGTCAGTTTCGCTTTTCTC        | ATGTGCAGGCTGTAGATCCC        |
| <i>Clock1a</i>                | CTGGAGGATCAGCTGGGTAG        | CACACACAGGCACAGACACA        |
| <i>Arntl1a</i>                | TAGAGCGCTGTTTGCTGATG        | GACCCGTGGACTTCAGTGAC        |
| <i>Per2</i>                   | ATGTCGATGGCTTTAGGCAG        | CGAGACATCCAGAAGGTGCT        |
| <i>Cry1a</i>                  | TCCGCTGTGTGTACATCCTC        | CAAACACTGCAGCAAAAACC        |
| <i>Clock2</i>                 | AGAACTGCTGAGGCTGCTGT        | TAACGTTGTGCTAGTCCCCT        |
| <i>Aanat2</i>                 | CGTTTATCTCGGTGTCCGGTGAATGTC | CTGTTCTAGTTTCTCTTTATCCCAGCC |
| <i>Mtnr1aa</i>                | CTGGTGATTTTCTCCGTCTACAGA    | CCGCCACTGCCAAACTC           |
| <i>Nfil3-5</i>                | CTTCCAACCCAAAACAGCGG        | GCAGCCTCGTTATTCTTGCG        |
| <i>Nfil3-6</i>                | TTTGCTTGACGCTCACTTC         | TTACACGGCGTTTCTCACGA        |
| <i>18S</i>                    | ACCACCCACAGAATCGAGAAA       | GCCTGCGGCTTAATTTGACT        |
| <i>Efl<math>\alpha</math></i> | GACAAGAGAACCATCGAG          | CCTCAAACCTCACCGACAC         |
